# Supplementary material for: Green tea polyphenols affect invasiveness of human gastric MKN-28 cells by inhibition of LPS or TNF-α induced Matrix Metalloproteinase-9/2
Source: PubMed Central journal article supplement — Biochim Open. 2016 Nov 5;3:56–63. doi: 10.1016/j.biopen.2016.10.002 (PMC5802102; doi:10.1016/j.biopen.2016.10.002), 2016-11-05

**Figure S1.** Most common green tea polyphenols.

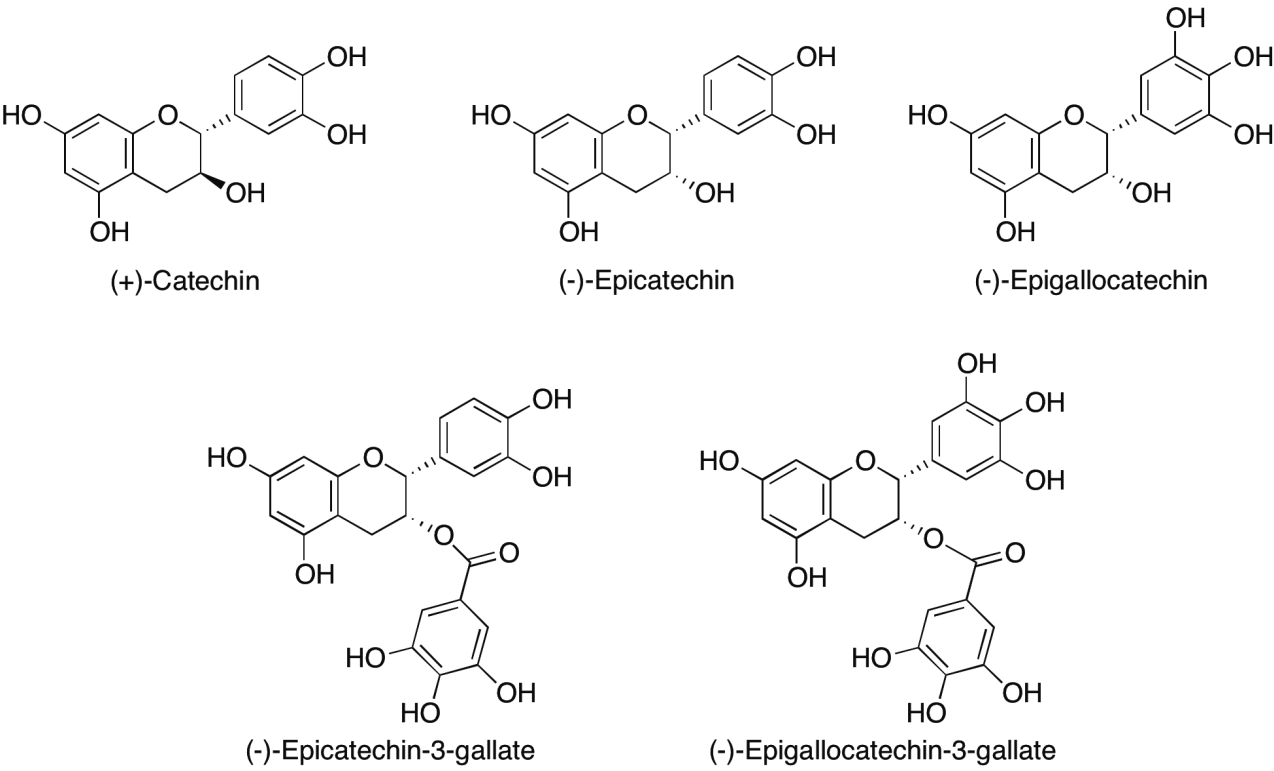

**Figure S2. Xanthine-xanthine oxidase (X-XO) induced citotoxicity in MKN-28 cells. Panel A.**

Subconfluent MKN-28 cells were incubated with Xanthine (1 mM) with the indicated amounts of Xanthine Oxidase for two hours. Control cells were incubated DMEM in the presence (10%) or in the absence of FBS. Cell viability was determined by MTT assay. The values represent the mean of three separate experiments performed in triplicate. Panel B. Semilogarithmic plot of the data reported in Panel A for the calculation of the concentration of Xanthine oxidase to observe 50% cell viability ( $IC_{50}$ ).

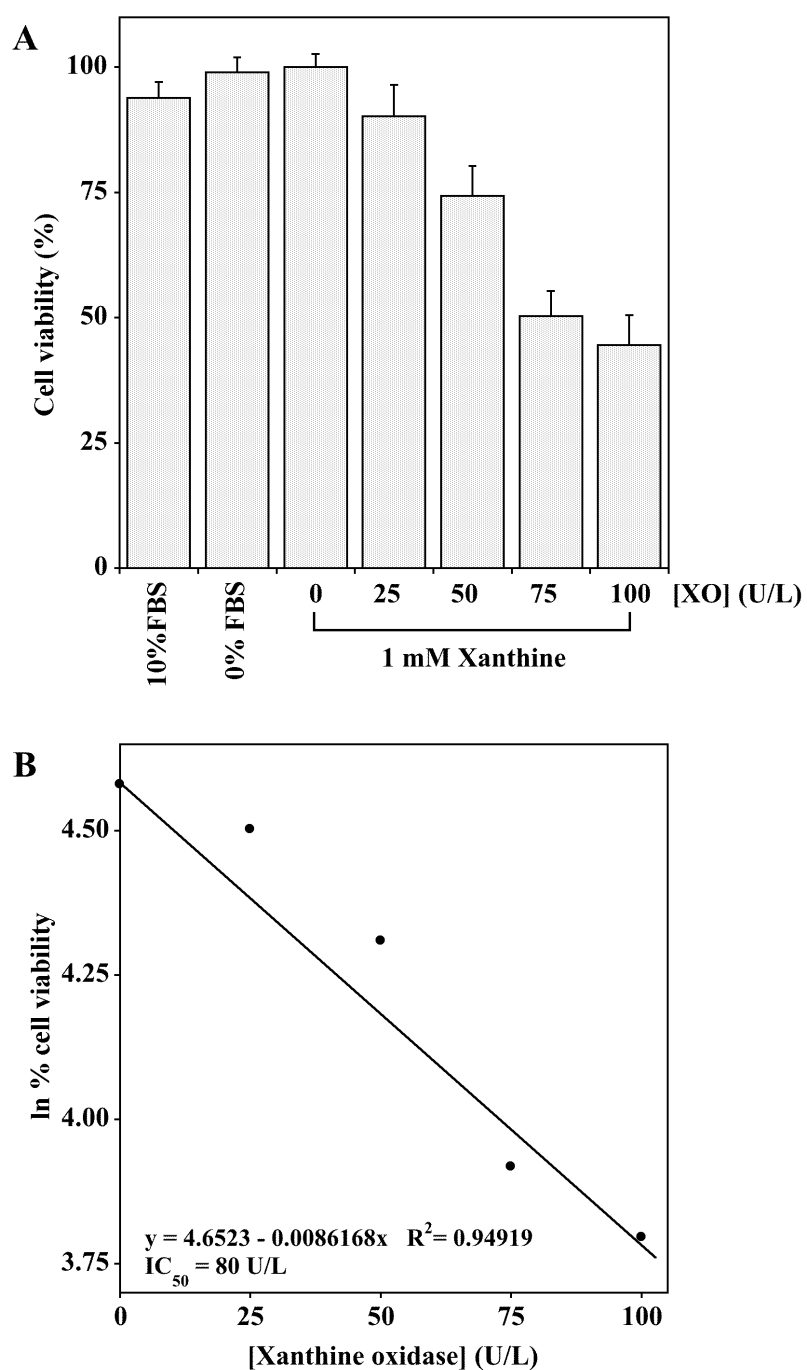

Supplement: mmc1.pdf [file mmc1.pdf]
